# Supplementary material for: Selective activation of MoS2 grain boundaries for enhanced electrochemical activity
Source: Royal Society of Chemistry journal article supplement (doi:10.1039/d4nh00005f), 2024-01-01
Supplement: d4nh00005f1.pdf [file d4nh00005f1.pdf]

## Supporting Information

# Selective Activation of MoS<sub>2</sub> Grain Boundaries for Enhanced Electrochemical Activity

Radha Raman<sup>a,b,c,d</sup>, Jeyavelan Muthu<sup>b,d,e</sup>, Zhi-Long Yen<sup>b,c,f</sup>, Mohammad Qorbani<sup>g,h</sup>, Yu-Xiang Chen<sup>b,c,f</sup>, Ding-Rui Chen<sup>b,c,f</sup>, Mario Hofmann<sup>d\*</sup> and Ya-Ping Hsieh<sup>b\*</sup>

<sup>a</sup> Department of Physics, National Central University, Taoyuan 32001, Taiwan

<sup>b</sup> Institute of Atomic and Molecular Sciences, Academia Sinica, Taipei 10617, Taiwan.

<sup>c</sup> Molecular Science and Technology Program, Taiwan International Graduate Program, Academia Sinica, Taipei 10617, Taiwan

<sup>d</sup> Department of Physics, National Taiwan University, Taipei 10617, Taiwan

<sup>e</sup> Nanoscience and Technology Program, Taiwan International Graduate Program, Academia Sinica, Taipei 115, Taiwan.

<sup>f</sup> International Graduate Program of Molecular Science and Technology, National Taiwan University, Taipei 10617, Taiwan

<sup>g</sup> Center for Condensed Matter Sciences, National Taiwan University, Taipei 10617, Taiwan

<sup>h</sup> Center of Atomic Initiative for New Materials, National Taiwan University, Taipei 10617, Taiwan

## S1. Calculation of local electrochemical activity of MoS<sub>2</sub> by gold nanoparticles deposition

### coverage

The extent of localized electrochemical activity in MoS<sub>2</sub> can be assessed by quantifying the coverage of AuNPs (gold nanoparticles). A greater deposition indicates enhanced electron transfer to that specific site, signifying a more active area.

To compute this coverage, we utilized an Atomic Force Microscope (AFM) image of MoS<sub>2</sub> with deposited AuNPs. The AFM image was transformed into an 8-bit binary format and then subjected to thresholding using ImageJ software <sup>1</sup> (depicted in **Figure S1(b,d)**). To perform this analysis, distinct areas comprising the basal plane and the edges were meticulously separated.

The coverage of nanoparticles was determined using the following relationship:

$$\text{Nanoparticles coverage} = \frac{\text{Area of Au Nanoparticles}}{\text{Area of MoS}_2}$$

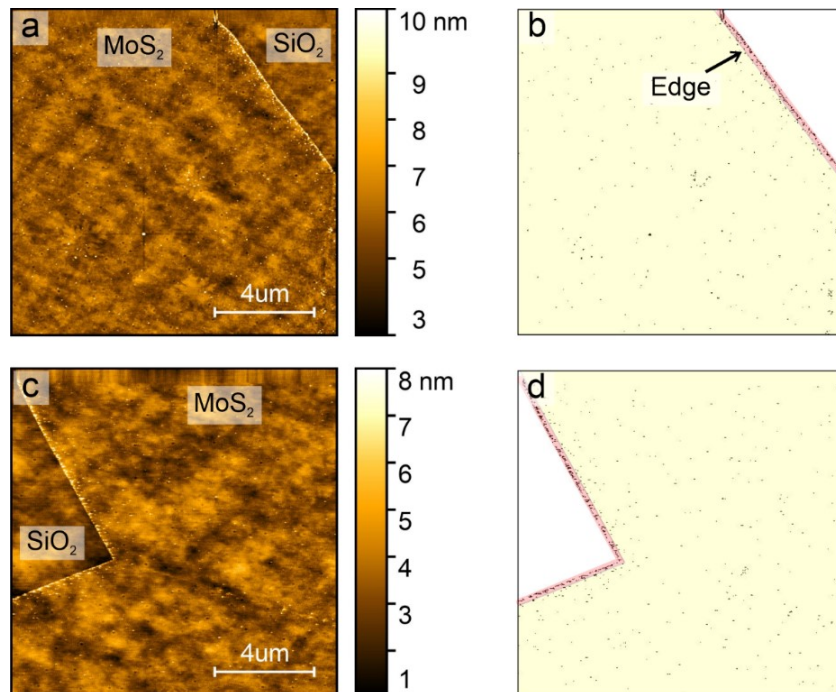

Figure S 1 Nanoparticles coverage analysis: 1(a) AFM Image of MoS<sub>2</sub> with Deposited AuNPs. (b) Threshold Image of the AFM Depicted in (a), After Processing Using ImageJ Software. (c) AFM Image of MoS<sub>2</sub> with Deposited AuNPs (d) Threshold Image of the AFM Depicted in (c)

| Au Decorated MoS <sub>2</sub> | Au NPs % Area (Edge) | Au NPs %Area (Basal Plane) | Ratio (Edge/Basal Plane) |
|-------------------------------|----------------------|----------------------------|--------------------------|
| (b)                           | 17.741               | 0.229                      | 77.47                    |
| (d)                           | 16.611               | 0.233                      | 71.29                    |

## S2. Numerical simulation of catalytic activity

Table 1. Comparison of Nanoparticles Coverage on MoS<sub>2</sub> basal plane and edge Calculated from AFM Images (S1(b) and S1(d) Using ImageJ

Numerical simulations on the total catalytic HER activity were carried out in MATLAB®. For this purpose, the film was discretized into 2D elements and each area was assigned a value for electrocatalytic turn-over frequency (TOF) based on experimental results.<sup>2</sup> An increasing coverage from initial nucleation seeds was emulated by sequentially adding elements at the edge of MoS<sub>2</sub> grains. Anisotropic growth was considered by enhancing the attachment in crystallographic direction. Moreover, the initial seed orientation was set to be random, to avoid merging into single-crystalline films. Once these outgrowing edges touched, they were considered grain boundaries and both their TOF value was changed and their growth was stopped. The growth process was continued until the coverage exceeded 99%.

### S3. Electrochemical characterization

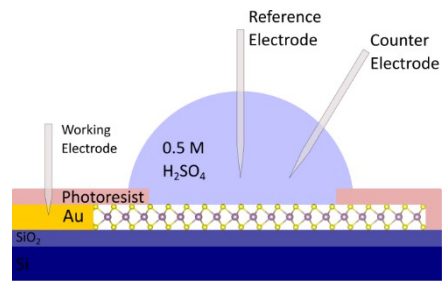

*Figure S 2 Schematic of Electrochemical Measurement*

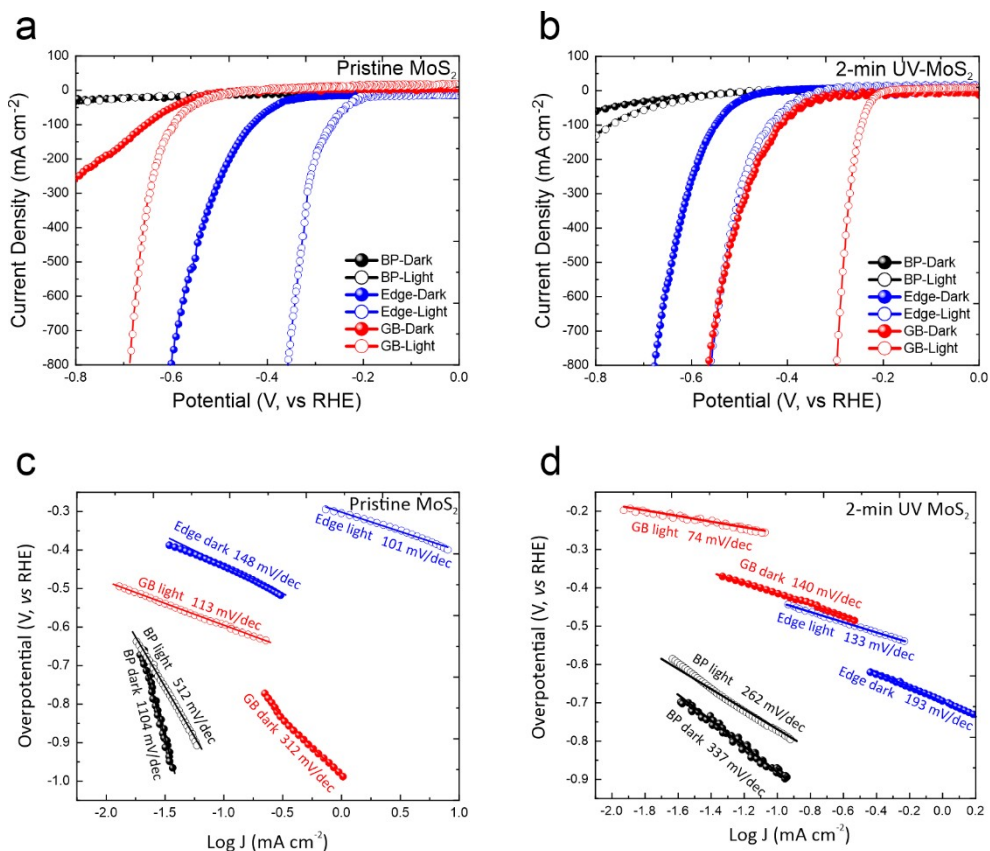

Figure S 3 **Electrochemical Characterization of MoS<sub>2</sub> under Dark and Light Conditions.** (a) Polarization curve obtained for the pristine MoS<sub>2</sub> samples, under dark condition (filled circles) and light condition (open circles). (b) Polarization curve obtained for the 2 minutes UV-treated MoS<sub>2</sub> samples, under dark condition (filled circles) and light condition (open circles). (c) Tafel slopes corresponding to the measurements of pristine MoS<sub>2</sub> samples. (d) Tafel slopes of the UV-treated MoS<sub>2</sub> samples.

#### S4. Analysis of spectroscopy following extended exposure to UV-ozone

##### Raman Analysis

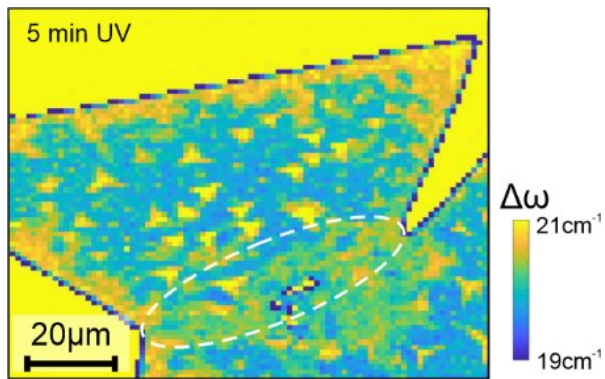

Figure S 4 Spatial distribution of  $\Delta\omega$  for 5-min UV-treated  $\text{MoS}_2$

### KPFM Analysis

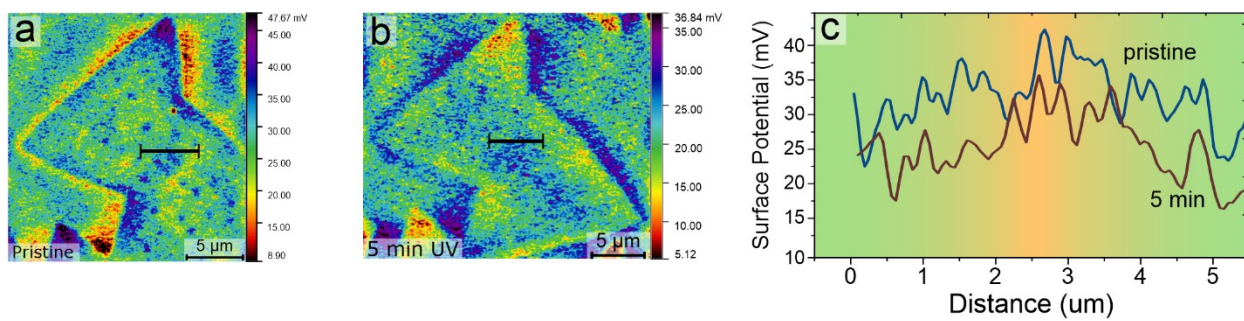

Figure S 5 KPFM surface potential map of (a) pristine (a) 5 min UV-treated  $\text{MoS}_2$  (c) corresponding cross-sectional plot for pristine and 5 min UV treated  $\text{MoS}_2$  at GB

### XPS Analysis

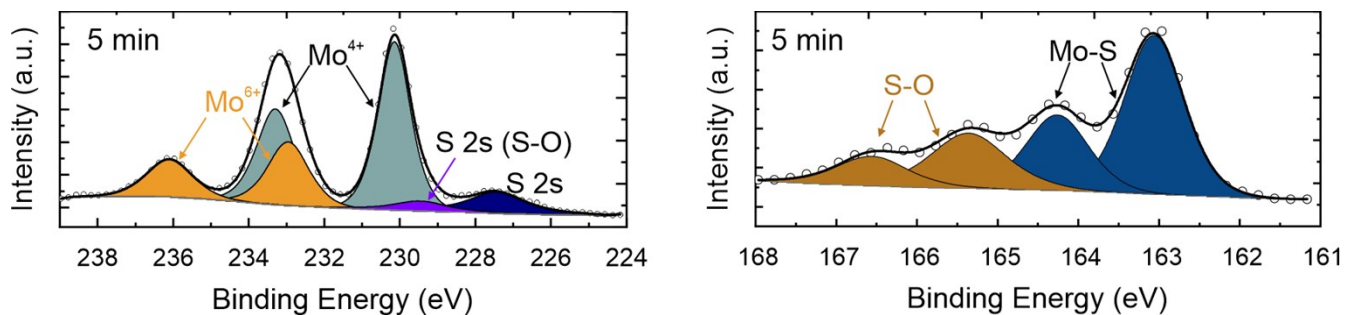

Figure S 6 XPS investigation of MoS<sub>2</sub> subjected to 5-min UV treatment: Mo 3d spectra illustrating increased MoO<sub>3</sub> concentration (f) analysis of S2p region signals

### S5. Stability test of the devices and Au photodeposition after 20 cycles of LSV at GB

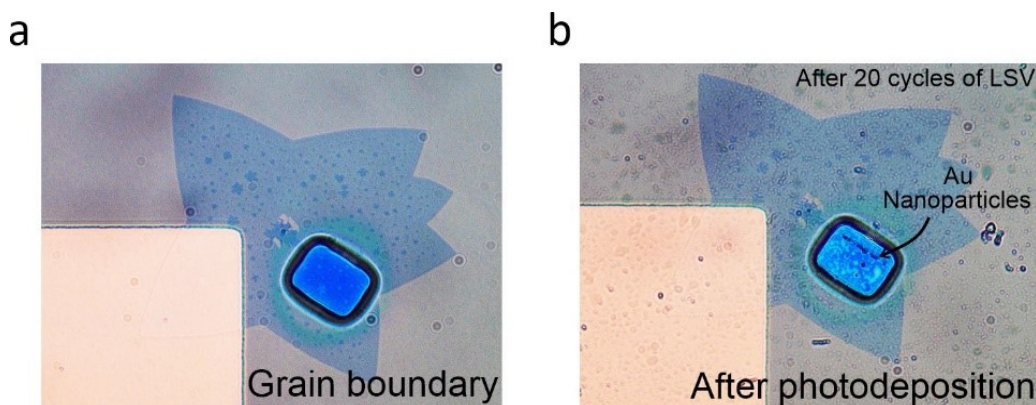

Figure S 7 Stability test of the MoS<sub>2</sub> flakes containing grain boundaries. (a) Micrograph of the device featuring an exposed window at the grain boundary. (b) Micrograph illustrating the selectively deposited Au nanoparticles at the grain boundary after 20 cycles of Linear Sweep Voltammetry (LSV) measurements. The Au nanoparticles were photo-deposited following 20 cycles of LSV.



### S6. Gibbs free energy of hydrogen adsorption in various configuration:

#### O-adsorption

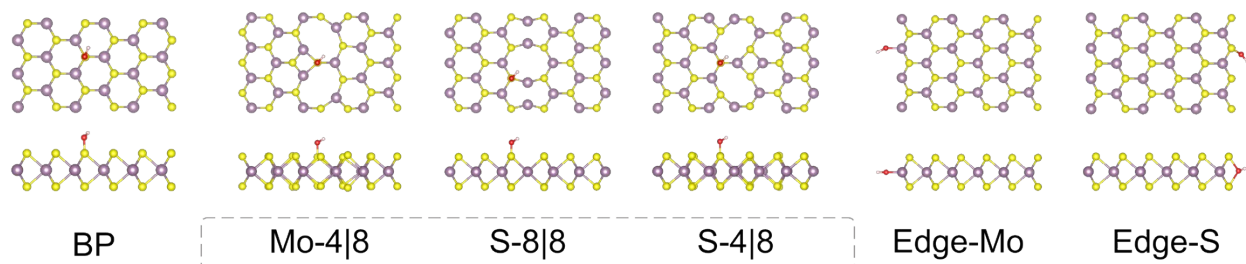

#### S/O-substitution

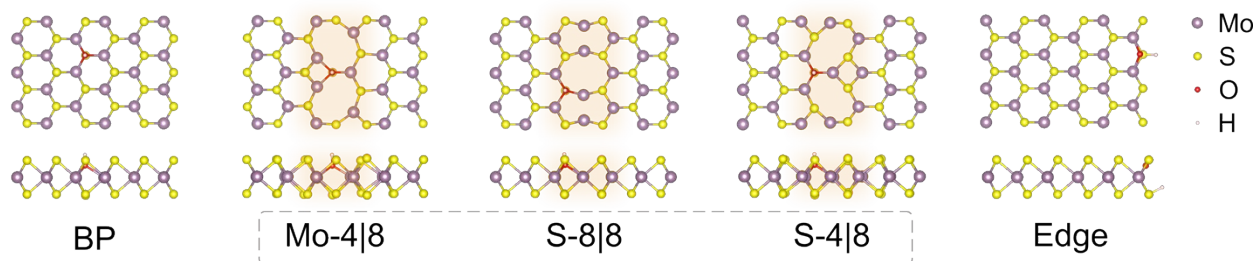

Figure S 8 Hydrogen adsorption configuration for the (a) O-adsorbed and (b) S/O substituted  $\text{MoS}_2$  system



## References

(1) Schneider, C. A.; Rasband, W. S.; Eliceiri, K. W. NIH Image to ImageJ: 25 years of image analysis. *Nature methods* **2012**, *9* (7), 671-675.

(2) Li, G.; Zhang, D.; Qiao, Q.; Yu, Y.; Peterson, D.; Zafar, A.; Kumar, R.; Curtarolo, S.; Hunte, F.; Shannon, S. All the catalytic active sites of MoS<sub>2</sub> for hydrogen evolution. *Journal of the American Chemical Society* **2016**, *138* (51), 16632-16638.
